# Supplementary material for: The transdiagnostic structure of mental effort avoidance
Source: PubMed Central journal article supplement (PMC6368591; doi:10.1038/s41598-018-37802-1), 2019-02-08
Supplement: 41598_2018_37802_MOESM1_ESM.pdf [file 41598_2018_37802_MOESM1_ESM.pdf]

**Supplemental information:**

The transdiagnostic structure of mental effort avoidance

Edward H. Patzelt<sup>1,2\*</sup> MA, Wouter Kool<sup>1</sup> PhD, Alexander J. Millner<sup>1</sup>

PhD, Samuel J. Gershman<sup>1,2</sup> PhD

<sup>1</sup>Department of Psychology, Harvard University

<sup>2</sup>Center for Brain Science, Harvard University

Supplemental tables: 4

Supplemental figures: 7

## Supplemental tables and figures

Supplemental table 1. Posterior probabilities of relationship between self-report measures and demand avoidance (excluding < 90% accuracy; N = 723)

| <i>Construct</i>        | Neg (< 0) | Pos (> 0) |
|-------------------------|-----------|-----------|
| Perseverance (lack of)  | 2.4%      | 97.6%     |
| Rumination              | 23.2%     | 76.8%     |
| Anxiety Sensitivity     | 25.9%     | 74.1%     |
| Apathy                  | 37.8%     | 62.3%     |
| Premeditation (lack of) | 39.0%     | 61.0%     |
| Barratt Impulsiveness   | 45.3%     | 54.7%     |
| Social Anxiety          | 47.1%     | 52.9%     |
| Trait Anxiety           | 50.2%     | 49.8%     |
| Schizotypy              | 54.8%     | 45.2%     |
| Sensation Seeking       | 60.4%     | 39.6%     |
| Negative Urgency        | 65.6%     | 34.4%     |
| Uncertainty Intolerance | 67.9%     | 32.2%     |
| Emotion Dysregulation   | 73.0%     | 27.0%     |
| Alcohol Use             | 74.0%     | 26.0%     |
| Depression              | 77.8%     | 22.2%     |
| Disordered Eating       | 78.2%     | 21.8%     |
| Distress Intolerance    | 94.5%     | 5.6%      |
| Positive Urgency        | 94.9%     | 5.1%      |
| Obsessive-Compulsive    | 97.8%     | 2.2%      |

Supplemental table 1. Participants with less than 90% accuracy were excluded. Table showing the posterior probability density over  $\beta$  (the coefficient relating self-report measure severity to low demand choices) that each self-report measure is associated with decreases (i.e., negative <0; more mental effort) or increases (i.e. positive > 0; less mental effort) in demand avoidance. The more the posterior probability density is <0 or >0 , the higher the probability that there is a relationship between the measure and the expression of mental effort.

Supplemental table 2. Posterior probabilities of relationship between psychiatric factors and demand avoidance (excluding < 90% accuracy; N = 723)

| <i>Construct</i>                        | Neg (< 0) | Pos (> 0) |
|-----------------------------------------|-----------|-----------|
| Anxious-depression                      | 99.3%     | 0.7%      |
| Compulsive Behavior & Intrusive Thought | 18.2%     | 81.9%     |
| Social Withdrawal                       | 19.3%     | 80.8%     |

Supplemental table 2. Participants with less than 90% accuracy were excluded. Table showing the posterior probability density over  $\beta$  (the coefficient relating transdiagnostic factor severity to low demand choices) that each factor is associated with decreases (i.e., negative <0; more mental effort) or increases (i.e. positive > 0; less mental effort) in demand avoidance. The more the posterior probability density is <0 or >0 , the higher the probability that there is a relationship between the factor and the expression of mental effort.

| Measure                     | Mean  | SD    | Min   | Max    |
|-----------------------------|-------|-------|-------|--------|
| Age                         | 34.93 | 10.18 | 18.00 | 73.00  |
| IQ                          | 99.13 | 9.73  | 81.02 | 126.82 |
| Anxiety Sensitivity         | 17.29 | 13.60 | 0.00  | 68.00  |
| Negative Urgency            | 24.02 | 7.90  | 12.00 | 48.00  |
| Premeditation (lack of)     | 18.87 | 5.40  | 11.00 | 41.00  |
| Perseverance (lack of)      | 18.27 | 5.80  | 10.00 | 39.00  |
| Sensation Seeking           | 27.73 | 8.50  | 12.00 | 48.00  |
| Positive Urgency            | 22.58 | 8.75  | 14.00 | 54.00  |
| Distress Intolerance        | 40.60 | 13.71 | 19.00 | 71.00  |
| Emotion Dysregulation       | 86.56 | 17.44 | 36.00 | 146.00 |
| Uncertainty Intolerance     | 63.73 | 23.57 | 27.00 | 131.00 |
| Rumination                  | 42.78 | 13.71 | 22.00 | 84.00  |
| Alcohol Use                 | 3.85  | 4.48  | 0.00  | 34.00  |
| Apathy                      | 32.64 | 9.97  | 18.00 | 64.00  |
| Barratt Impulsiveness       | 56.84 | 12.21 | 0.00  | 98.00  |
| Obsessive-Compulsive        | 9.89  | 10.54 | 0.00  | 54.00  |
| Depression                  | 37.49 | 10.57 | 0.00  | 74.00  |
| Disordered Eating           | 56.56 | 17.67 | 0.00  | 149.00 |
| Schizotypy                  | 12.50 | 5.97  | 1.00  | 32.00  |
| Social Anxiety              | 43.85 | 16.68 | 0.00  | 96.00  |
| Trait Anxiety               | 39.41 | 14.62 | 0.00  | 78.00  |
| Anxious-Depression Factor   | 3.32  | 1.01  | 1.60  | 6.07   |
| Compulsive-Intrusive Factor | 2.35  | 0.94  | 0.65  | 5.59   |
| Social Withdrawal Factor    | 2.84  | 1.07  | 1.38  | 5.77   |

Supplemental table 3. Means, standard deviation, and range of analysis variables.

|                     | <b>Excluded</b> | <b>Not Excluded</b> | <b>Total</b> |
|---------------------|-----------------|---------------------|--------------|
| <b>Diagnosis</b>    | 43              | 302                 | <b>345</b>   |
| <b>No Diagnosis</b> | 51              | 509                 | <b>560</b>   |
| <b>Total</b>        | <b>94</b>       | <b>811</b>          | <b>905</b>   |

$\chi^2 = 2.236$ , with 1df,  $p = 0.1348$

Supplemental table 4. Participants with a diagnosis were not excluded at a higher rate than those without a diagnosis.





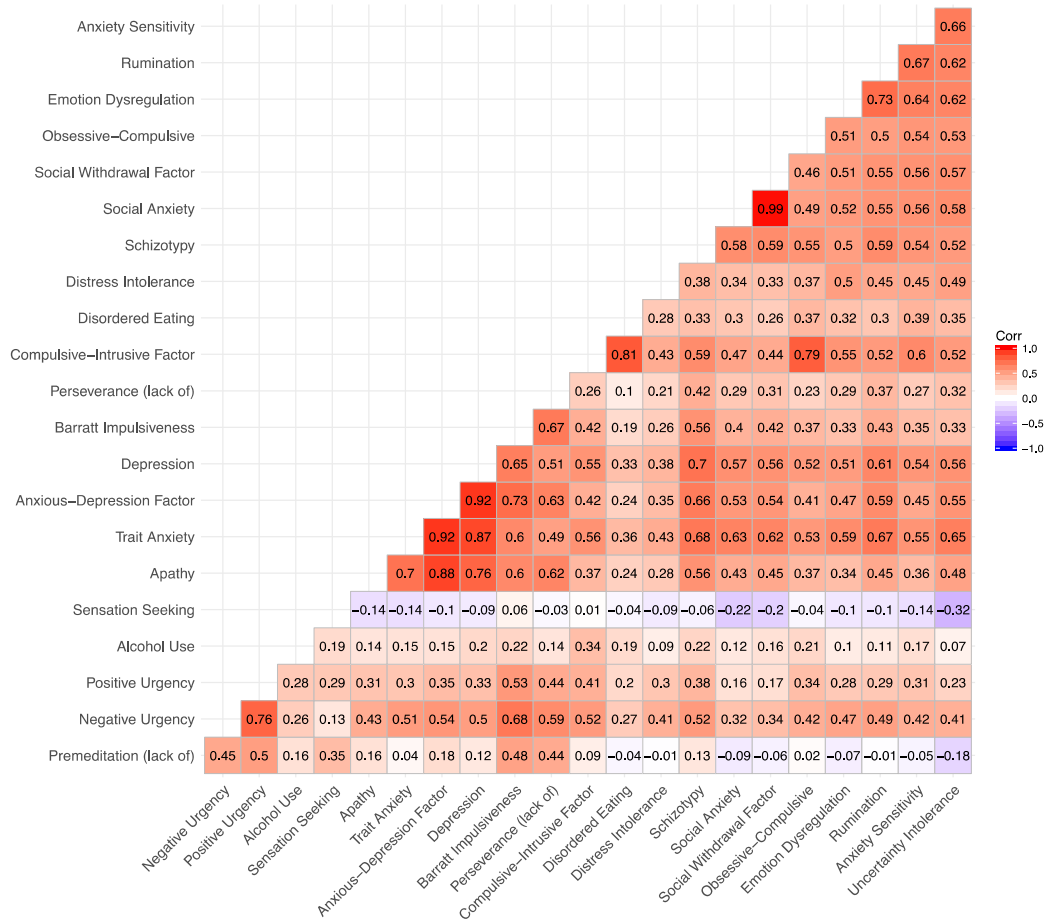

Supplemental figure S3. Correlations among the measures.



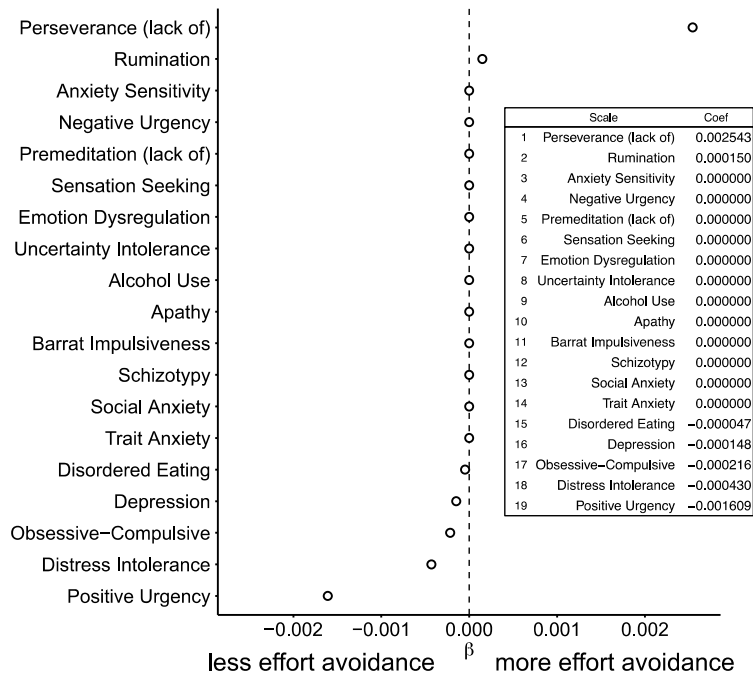

Supplemental figure S4. All self-report measures were entered into a single regression while covarying age, IQ, and gender. Elastic net regularization was applied and the inset table displays the coefficient value for each measure.

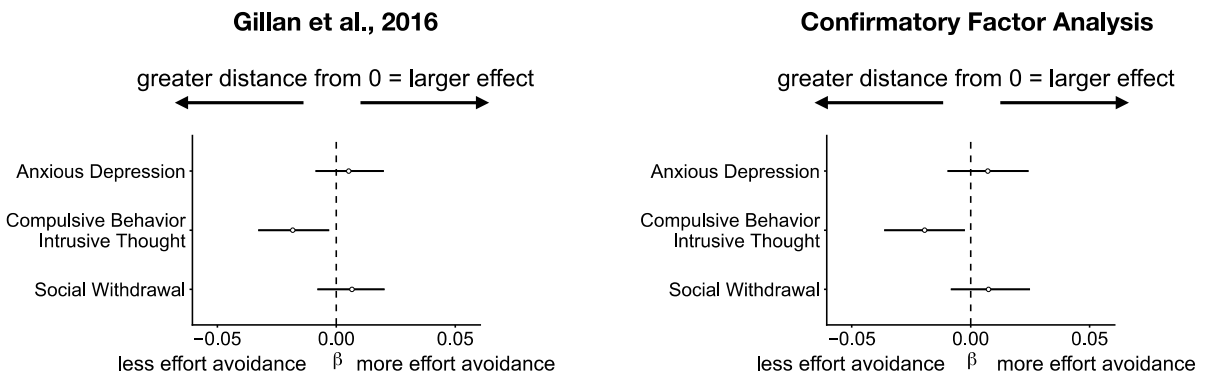

Supplemental figure S5. Comparison between regressing the Gillan (2016) loadings onto proportion low demand choices and the CFA generated loadings onto proportion low demand choices.

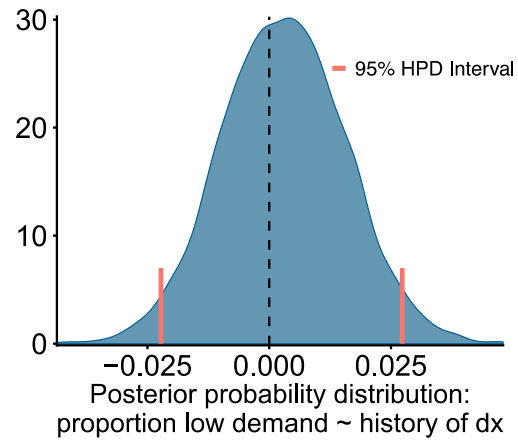

Supplemental figure S6: The posterior probability distribution when regressing history of a mental health diagnosis onto demand avoidance provided little evidence of an effect.

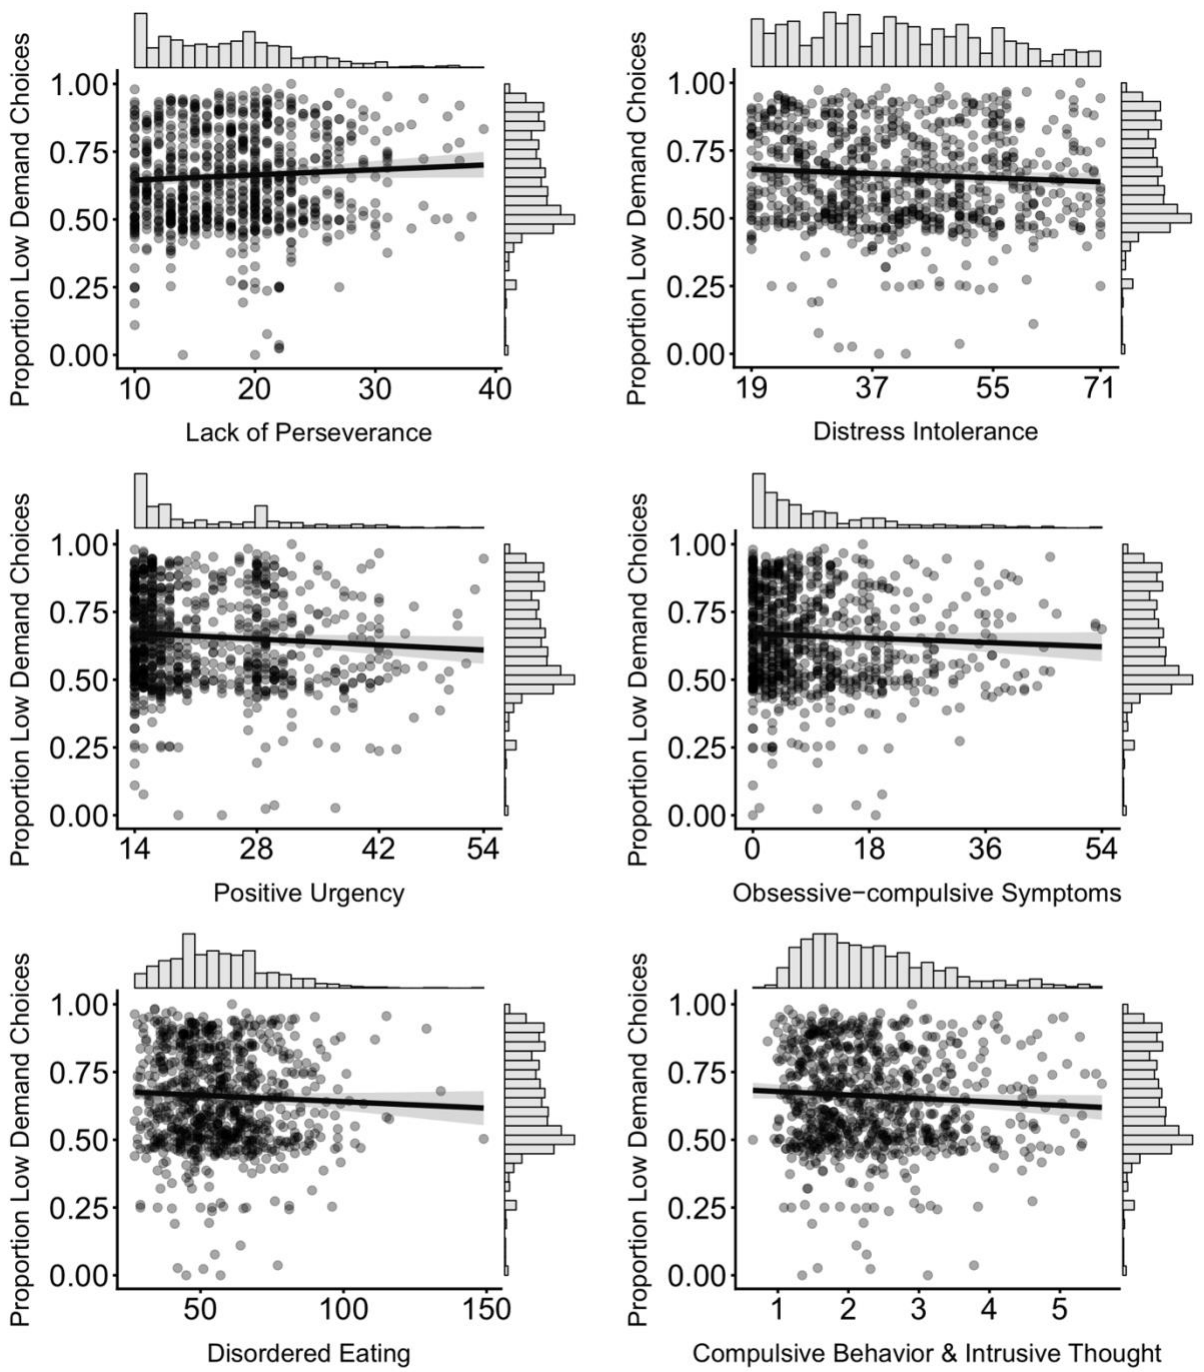

Supplemental figure S7: The constructs with the main findings are graphed with credible intervals around the regression line and marginal histograms along the axes.
